# Supplementary material
Source: publisher figshare collection journal article supplement (https://frontiersin.figshare.com/ndownloader/files/31375801)
Supplement: Supplementary file [file 31375801]

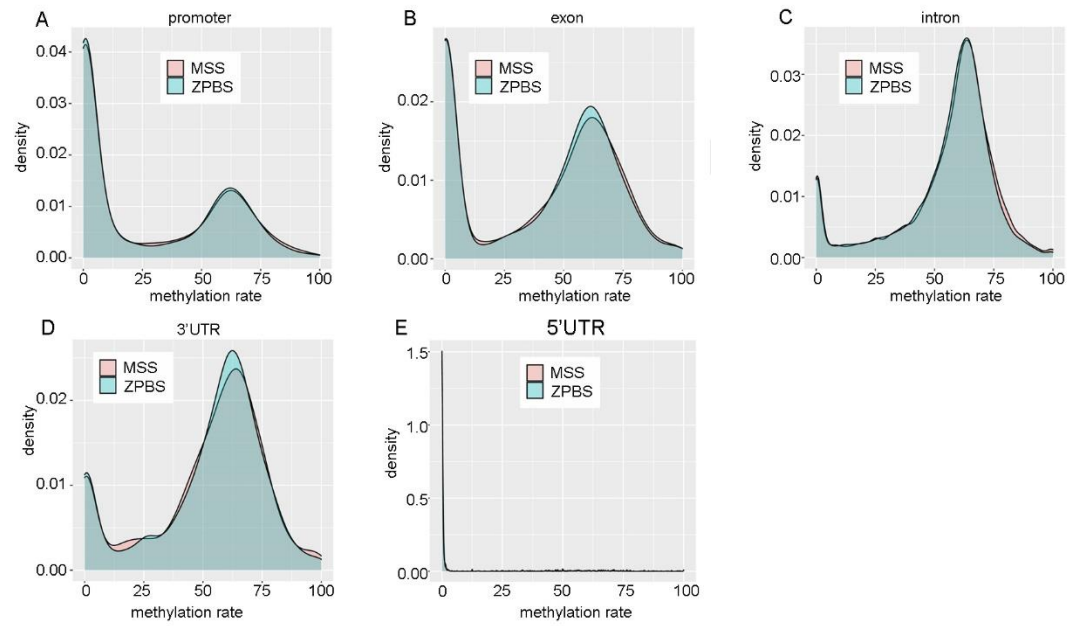

**Supplementary Figure 3.** Comparisons for methylation rate distributions of autism genes between ZPBS and MSS. Methylation rates of promoter (A), exon (B), intron (C), 3'UTR (D) and 5'UTR (E) were compared between ZPBS and MSS.
